# Supplementary material
Source: PubMed Central journal article supplement (PMC7522775)
Supplement: jamainternmed-e203514-s001.pdf [file jamainternmed-e203514-s001.pdf]

## Supplementary Online Content

Tau N, Shepshelovich D. Assessment of data sources that support US Food and Drug Administration medical devices safety communications. *JAMA Intern Med*. Published online September 28, 2020. doi:10.1001/jamainternmed.2020.3514

**eTable.** Characteristics of Medical Device Safety Communications

This supplementary material has been provided by the authors to give readers additional information about their work.

**eTable.** Characteristics of Medical Device Safety Communications

| <b>MDSC publication date</b> | <b>Medical device</b>                                       | <b>Initial approval year<sup>a</sup></b> | <b>Device Class<sup>a</sup></b> | <b>Approval pathway<sup>a</sup></b> | <b>Safety issue</b>                                                                                                             | <b>Signal source</b>           | <b>FDA action</b>                      | <b>Highest recall class</b> |
|------------------------------|-------------------------------------------------------------|------------------------------------------|---------------------------------|-------------------------------------|---------------------------------------------------------------------------------------------------------------------------------|--------------------------------|----------------------------------------|-----------------------------|
| 26-Jan-2011                  | Breast implants                                             | 1979                                     | 3                               | PMA                                 | Anaplastic large cell lymphoma                                                                                                  | Regulator-initiated assessment | Call for caution with approved usage   | NA                          |
| 5-May-2011                   | Weck Hem-o-Lok Ligating Clips                               | 1990                                     | 2                               | 510(k)                              | Patient death                                                                                                                   | MDR                            | Warning of unauthorized indication     | II                          |
| 2-Jun-2011                   | Thermography                                                | NA                                       | NA                              | NA                                  | Promotion of and unauthorized and unstudied device                                                                              | Regulator-initiated assessment | Warning of unauthorized device         | NA                          |
| 25-Aug-2011                  | ShoulderFlex Massager                                       | NA                                       | NA                              | NA                                  | Death, near-strangulation                                                                                                       | Regulator-initiated assessment | Withdrawal                             | NA                          |
| 13-Oct-2011                  | Surgical fires                                              | NA                                       | NA                              | NA                                  | Surgical fires                                                                                                                  | Regulator-initiated assessment | Call for caution with approved usage   | NA                          |
| 10-Feb-2012                  | Hand-held Dental X-Ray Units                                | NA                                       | NA                              | NA                                  | Devices sold online outside the U.S. and directly shipped to customers in the U.S.                                              | Regulator-initiated assessment | Warning of unauthorized device         | NA                          |
| 16-Feb-2012                  | Spinbrush line of Powered Toothbrushes                      | NA                                       | NA                              | NA                                  | Cuts to the mouth and gums, chipped or broken teeth, swallowing and choking on the broken pieces, injuries to the face and eyes | MDR                            | Call for caution with approved usage   | NA                          |
| 10-May-2012                  | Chronic Cerebrospinal Venous Insufficiency Treatment        | NA                                       | NA                              | NA                                  | Death from bleeding in the brain, permanent paralysis from a stroke                                                             | Regulator-initiated assessment | Warning of unauthorized device         | NA                          |
| 25-May-2012                  | Dialysate                                                   | 1981                                     | 2                               | 510(k)                              | Alkali dosing errors that occurred during hemodialysis using dialysate concentrates containing acetic acid and acetate          | MDR                            | Call for caution with approved usage   | NA                          |
| 30-May-2012                  | Blunt-Tip Suture Needles                                    | NA                                       | NA                              | NA                                  | Using blunt-tip suture needles reduces the risk of needlestick injuries                                                         | Scientific publications        | Use device instead of less safe option | NA                          |
| 8-Jun-2012                   | Other-Sonic Generic Ultrasound Transmission Gel             | 1996                                     | 2                               | 510(k)                              | Colonization or infection with the bacteria <i>Pseudomonas aeruginosa</i>                                                       | MDR                            | Withdrawal                             | I                           |
| 28-Jun-2012                  | ev3 Onyx Liquid Embolic System                              | 2005                                     | 3                               | PMA                                 | Patient deaths and catheter breakage that may be related to catheter entrapment                                                 | MDR                            | Call for caution with approved usage   | NA                          |
| 8-Aug-2012                   | Stryker Wingspan Stent System                               | 2005                                     | 2                               | HDE                                 | Change in indications due to results from publications                                                                          | Scientific publications        | Call for caution with approved usage   | NA                          |
| 16-Aug-2012                  | St. Jude Riata Implantable Cardioverter Defibrillator Leads | 2002                                     | 3                               | PMA                                 | Premature erosion of the insulation around the electrical conductor wires potentially resulting in death                        | MDR                            | Call for caution with approved usage   | I                           |

| <b>MDSC publication date</b> | <b>Medical Device</b>                                                     | <b>Initial approval year <sup>a</sup></b> | <b>Device Class <sup>a</sup></b> | <b>Approval pathway <sup>a</sup></b> | <b>Safety issue</b>                                                                               | <b>Signal source</b>           | <b>FDA action</b>                    | <b>Highest recall class</b> |
|------------------------------|---------------------------------------------------------------------------|-------------------------------------------|----------------------------------|--------------------------------------|---------------------------------------------------------------------------------------------------|--------------------------------|--------------------------------------|-----------------------------|
| 28-Sep-2012                  | Mammography Medisound, Inc./Digital Radiology Center, in Kissimmee        | NA                                        | 2                                | NA                                   | Poor quality images and possible unreliable results                                               | Regulator-initiated assessment | Warning of specific lots/providers   | NA                          |
| 17-Jan-2013                  | Metal-on-Metal Hip Implants                                               | 2000                                      | 2                                | 510(k)                               | Metal release which may cause damage to bone and/or soft tissue surrounding the implant and joint | Regulator-initiated assessment | Call for caution with approved usage | II                          |
| 27-Mar-2013                  | Stryker Neptune Waste Management Systems                                  | 1999                                      | 2                                | 510(k)                               | Death and injury                                                                                  | MDR                            | Withdrawal                           | I                           |
| 19-Apr-2013                  | Covers for Medical Bed Mattresses                                         | NA                                        | NA                               | NA                                   | Mattress covers failing to prevent blood and body fluids from leaking into the mattress           | MDR                            | Call for caution with approved usage | NA                          |
| 7-May-2013                   | Covidien Endo GIA Articulating 60-3.5 Surgical Stapler Reloads            | 2010                                      | 2                                | 510(k)                               | Stapler Reloads labeled sterile were stolen from the manufacturer prior to sterilization          | MDR                            | Warning of specific lots/providers   | NA                          |
| 13-Jun-2013                  | Cybersecurity for Medical Devices and Hospital Networks                   | NA                                        | NA                               | NA                                   | No any patient injuries or deaths                                                                 | Homeland security              | Call for caution with approved usage | NA                          |
| 27-Jun-2013                  | Mammography Problems at San Sebastian X-Ray in San Sebastian, Puerto Rico | NA                                        | 2                                | NA                                   | Poor quality mammograms.                                                                          | Regulator-initiated assessment | Warning of specific lots/providers   | NA                          |
| 17-Oct-2013                  | St. Jude Amplatzer Atrial Septal Occluder                                 | 2001                                      | 3                                | PMA                                  | Erosions associated with the device                                                               | MDR                            | Call for caution with approved usage | NA                          |
| 3-Dec-2013                   | Phillips Automated External Defibrillators                                | 2004                                      | 3                                | 510(k)                               | Internal AED electrical component failure                                                         | MDR                            | Call for caution with approved usage | I                           |
| 12-Dec-2013                  | Nipple Aspirate Test                                                      | 2003                                      | 2                                | 510(k)                               | Promotion of unproven and unauthorized medical device                                             | Regulator-initiated assessment | Withdrawal                           | I                           |
| 17-Apr-2014                  | Laparoscopic Uterine Power Morcellation                                   | 1997                                      | 2                                | 510(k)                               | Risk of tumor spread                                                                              | Regulator-initiated assessment | Warning of unauthorized indication   | NA                          |
| 29-Apr-2014                  | GenStrip Blood Glucose Test                                               | 2012                                      | 2                                | 510(k)                               | Extensive violations of federal quality manufacturing regulations                                 | Regulator-initiated assessment | Withdrawal                           | NA                          |
| 23-May-2014                  | Sterrad Cyclesure 24 Biological Indicator                                 | 2011                                      | 2                                | 510(k)                               | Critical shortage of device                                                                       | MDR                            | Other                                | NA                          |
| 23-Jun-2014                  | Mammography at Big Sky Diagnostic Imaging, LLC in Butte, Montana          | NA                                        | 2                                | NA                                   | Deficiencies in clinical cases submitted for facility's accreditation renewal application         | Regulator-initiated assessment | Warning of specific lots/providers   | NA                          |

| MDSC publication date | Medical Device                                                               | Initial approval year <sup>a</sup> | Device Class <sup>a</sup> | Approval pathway <sup>a</sup> | Safety issue                                                                                                                             | Signal source                  | FDA action                           | Highest recall class |
|-----------------------|------------------------------------------------------------------------------|------------------------------------|---------------------------|-------------------------------|------------------------------------------------------------------------------------------------------------------------------------------|--------------------------------|--------------------------------------|----------------------|
| 5-Aug-2014            | Enhancement Medical's "Expression" Intranasal Splint                         | NA                                 | NA                        | NA                            | Swelling, tenderness, firmness, bumps, bruising, pain, redness, discoloration, itching, and the development of hard nodules              | MDR                            | Warning of unauthorized indication   | I                    |
| 21-Jan-2015           | Bone Graft Substitutes Containing Recombinant Proteins or Synthetic Peptides | 2001                               | 3                         | PMA                           | Usage in patients under age 18 leading to injuries, such as excess bone growth, fluid accumulation, inhibited bone healing, and swelling | Scientific publications        | Warning of unauthorized indication   | NA                   |
| 19-Feb-2015           | Endoscopic Retrograde Cholangiopancreatography (ERCP) Duodenoscopes          | NA                                 | 2                         | NA                            | Transmission of infectious agents including Carbapenem-Resistant Enterobacteriaceae                                                      | MDR                            | Call for caution with approved usage | NA                   |
| 24-Mar-2015           | Mammograms at Richard D. Adelman M.D. in Raleigh, North Carolina             | NA                                 | 2                         | NA                            | Deficiencies in clinical cases submitted for facility's accreditation renewal application                                                | Regulator-initiated assessment | Warning of specific lots/providers   | NA                   |
| 13-Apr-2015           | Mammograms at J. Bruce Jacobs M.D., Inc.                                     | NA                                 | 2                         | NA                            | Deficiencies in clinical cases submitted for facility's accreditation renewal application                                                | Regulator-initiated assessment | Warning of specific lots/providers   | NA                   |
| 30-Apr-2015           | Mammograms at Coastal Diagnostic Center in Pismo Beach                       | NA                                 | 2                         | NA                            | Deficiencies in clinical cases submitted for facility's accreditation renewal application                                                | Regulator-initiated assessment | Warning of specific lots/providers   | NA                   |
| 28-May-2015           | Soft Tissue Filler                                                           | 1981                               | 3                         | PMA                           | Block of blood vessels and blood supply restriction to tissues                                                                           | Scientific publications        | Call for caution with approved usage | NA                   |
| 31-May-2015           | Hospira LifeCare PCA3 and PCA5 Infusion Pump Systems                         | 2004                               | 2                         | 510(k)                        | No patient adverse events or unauthorized device access related to these vulnerabilities                                                 | Regulator-initiated assessment | Call for caution with approved usage | NA                   |
| 13-Jul-2015           | LARIAT Suture Delivery Device                                                | 2006                               | 2                         | 510(k)                        | Death, cardiac laceration and/or perforation, hemorrhage, hypotension, pericardial and pleural effusion, cardiac tamponade               | MDR                            | Warning of unauthorized indication   | NA                   |
| 31-Jul-2015           | Hospira Symbiq Infusion System                                               | 2012                               | 2                         | 510(k)                        | No patient adverse events or unauthorized access of device                                                                               | Homeland security              | Withdrawal                           | NA                   |
| 5-Aug-2015            | LVAD                                                                         | 2008                               | 3                         | PMA                           | Increase in the rate of pump thrombosis events, strokes                                                                                  | Scientific publications        | Call for caution with approved usage | NA                   |
| 17-Aug-2015           | Mammograms at Boston Diagnostic Imaging in Orlando, Florida                  | NA                                 | 2                         | NA                            | Problems associated with the quality of mammograms                                                                                       | Regulator-initiated assessment | Warning of specific lots/providers   | NA                   |
| 17-Sep-2015           | Flexible Bronchoscopes                                                       | 1981                               | 2                         | 510(k)                        | Infections or device contamination associated with flexible bronchoscopes                                                                | Regulator-initiated assessment | Call for caution with approved usage | II                   |

| MDSC publication date | Medical Device                                         | Initial approval year <sup>a</sup> | Device Class <sup>a</sup> | Approval pathway <sup>a</sup> | Safety issue                                                                                                                              | Signal source                  | FDA action                           | Highest recall class |
|-----------------------|--------------------------------------------------------|------------------------------------|---------------------------|-------------------------------|-------------------------------------------------------------------------------------------------------------------------------------------|--------------------------------|--------------------------------------|----------------------|
| 28-Sep-2015           | Cranial Perforators with an Automatic Clutch Mechanism | NA                                 | 2                         | NA                            | Injuries due to mechanism failing to disengage                                                                                            | MDR                            | Call for caution with approved usage | NA                   |
| 5-Oct-2015            | Bioprosthetic Aortic Valve                             | 1967                               | 3                         | PMA                           | Reduced leaflet motion, including both SAVR and TAVR devices                                                                              | Scientific publications        | Call for caution with approved usage | NA                   |
| 15-Oct-2015           | Heater-Cooler Devices                                  | 1989                               | 2                         | 510(k)                        | Nontuberculous Mycobacteria infections                                                                                                    | MDR                            | Call for caution with approved usage | II                   |
| 13-Nov-2015           | Ultrasonics Endoscope Washer/Disinfectors              | 1984                               | 2                         | 510(k)                        | Inability to validate adequate washing and disinfection of endoscopes                                                                     | Regulator-initiated assessment | Withdrawal                           | II                   |
| 21-Nov-2015           | Intravascular Medical Devices                          | 1985                               | 2                         | PMA                           | Pulmonary embolism and infarction, myocardial embolism and infarction, embolic stroke, tissue necrosis, death                             | MDR                            | Call for caution with approved usage | I                    |
| 22-Dec-2015           | Hand-held Laser Pointers                               | NA                                 | NA                        | NA                            | Pilots experiencing temporary "flash-blinding"                                                                                            | Regulator-initiated assessment | Other                                | NA                   |
| 23-Dec-2015           | FUJIFILM Medical Systems Model ED-530XT Duodenoscopes  | 2015                               | 2                         | 510(k)                        | Initiation of testing to validate the revised reprocessing instructions                                                                   | MDR                            | Call for caution with approved usage | II                   |
| 5-Jan-2016            | Customed, Inc. Surgical Convenience Packs and Trays    | 1990                               | 2                         | 510(k)                        | Voluntary recall of all its surgical convenience packs due to potentially compromised sterility                                           | MDR                            | Withdrawal                           | I                    |
| 19-Feb-2016           | Pentax Medical Duodenoscope Model ED-3490TK            | 2009                               | 2                         | 510(k)                        | Potential disease transfer                                                                                                                | MDR                            | Call for caution with approved usage | II                   |
| 25-Feb-2016           | Neurosurgical Head Holders (Skull Clamps)              | 1980                               | 2                         | 510(k)                        | Slippage resulting in patient injuries                                                                                                    | MDR                            | Call for caution with approved usage | NA                   |
| 15-Mar-2016           | Olympus Duodenoscope - TJF-160F and TJF-160VF          | 2002                               | 2                         | 510(k)                        | Submitted test protocols and data to validate reprocessing instructions                                                                   | MDR                            | Call for caution with approved usage | II                   |
| 29-Mar-2016           | OxySure Portable Emergency Oxygen System, Model 615    | 2005                               | 2                         | 510(k)                        | Insufficient oxygen flow, re-breathing of exhaled gases, burns, contusions, chemical exposure                                             | MDR                            | Withdrawal                           | II                   |
| 1-Jun-2016            | LivaNova PLC Stöckert 3T Heater-Cooler Systems         | 2006                               | 2                         | 510(k)                        | Infection with M. chimaera                                                                                                                | Scientific publications        | Call for caution with approved usage | II                   |
| 25-Aug-2016           | Programmable syringe pumps                             | NA                                 | NA                        | NA                            | Over- and under- infusion of high risk or life-sustaining medications, occlusion, detection failures, inadvertent boluses, therapy delays | MDR                            | Call for caution with approved usage | NA                   |
| 1-Sep-2016            | Sciex Mass Spectrometers                               | 2010                               | 1                         | NA                            | Potential inaccurate clinical diagnosis                                                                                                   | MDR                            | Call for caution with approved usage | II                   |

| MDSC publication date | Medical Device                                                             | Initial approval year <sup>a</sup> | Device Class <sup>a</sup> | Approval pathway <sup>a</sup> | Safety issue                                                                                                   | Signal source                  | FDA action                           | Highest recall class |
|-----------------------|----------------------------------------------------------------------------|------------------------------------|---------------------------|-------------------------------|----------------------------------------------------------------------------------------------------------------|--------------------------------|--------------------------------------|----------------------|
| 7-Sep-2016            | Screening tests for ovarian cancer                                         | NA                                 | NA                        | NA                            | Marketing of test with unsupported claims                                                                      | Regulator-initiated assessment | Warning of unauthorized device       | NA                   |
| 11-Oct-2016           | St. Jude Medical ICD and CRT-D Devices                                     | 2007                               | 3                         | PMA                           | Battery drainage within a day to a few weeks after an ERI alert                                                | MDR                            | Call for caution with approved usage | I                    |
| 22-Dec-2016           | ZIKV Detect IgM Capture ELISA (InBIOS)                                     | 2016                               | NA                        | EUA                           | Higher than expected false positive results                                                                    | MDR                            | Call for caution with approved usage | NA                   |
| 9-Jan-2017            | St. Jude Medical's Implantable Cardiac Devices and Merlin@home Transmitter | 2014                               | 3                         | PMA                           | No reports of patient harm related to these cybersecurity vulnerabilities.                                     | Homeland security              | Call for caution with approved usage | II                   |
| 11-Jan-2017           | Implantable Infusion Pumps                                                 | 1989                               | 3                         | PMA                           | Patient injury and death                                                                                       | MDR                            | Call for caution with approved usage | NA                   |
| 13-Jan-2017           | FUJIFILM older duodenoscope models                                         | 2015                               | 2                         | 510(k)                        | Potential disease transfer                                                                                     | MDR                            | Withdrawal                           | II                   |
| 9-Mar-2017            | SPS-1 Static Preservation Solution Distributed by Organ Recovery Systems   | 2010                               | 2                         | 510(k)                        | No reports of any post-operative infections or other adverse events directly linked to the identified products | MDR                            | Warning of specific lots/providers   | II                   |
| 17-May-2017           | Magellan LeadCare, LeadCare II, LeadCare Plus, and LeadCare Ultra          | 1997                               | 2                         | 510(k)                        | Inaccurate results when processing venous blood samples resulting in lead poisoning                            | MDR                            | Call for caution with approved usage | I                    |
| 15-Jun-2017           | Frameless Stereotaxic (Stereotactic) Navigation Systems                    | 1999                               | 2                         | 510(k)                        | Navigational accuracy errors during surgical procedures                                                        | MDR                            | Call for caution with approved usage | NA                   |
| 29-Aug-2017           | Abbott's (formerly St. Jude Medical) pacemaker and CRT-P devices           | 1989                               | 3                         | PMA                           | Unknown cyber vulnerability - no impact yet                                                                    | MDR                            | Call for caution with approved usage | II                   |
| 7-Nov-2017            | Laserworld and Ray Technologies International Laser Projectors             | NA                                 | NA                        | NA                            | Lack of required safety features. Devices did not function in a safe manner                                    | Regulator-initiated assessment | Other                                | NA                   |
| 14-Nov-2017           | Injectable Silicone for Body Contouring and Enhancement                    | NA                                 | NA                        | NA                            | Marketing of unauthorized device / unauthorized indication in unauthorized settings                            | Regulator-initiated assessment | Warning of unauthorized indication   | NA                   |

| MDSC publication date | Medical Device                                                                        | Initial approval year <sup>a</sup> | Device Class <sup>a</sup> | Approval pathway <sup>a</sup> | Safety issue                                                          | Signal source                        | FDA action                           | Highest recall class |
|-----------------------|---------------------------------------------------------------------------------------|------------------------------------|---------------------------|-------------------------------|-----------------------------------------------------------------------|--------------------------------------|--------------------------------------|----------------------|
| 3-Jan-2018            | Mammograms at Palm Beach Broward Medical Imaging Center in Deerfield Beach, Florida   | NA                                 | 2                         | NA                            | Mammography machine failed quality test. Unknown impact               | Regulator-initiated assessment       | Warning of specific lots/providers   | NA                   |
| 17-Jan-2018           | Zoll LifeVest 4000 Wearable Cardioverter Defibrillator                                | 2009                               | 3                         | PMA                           | Device failure                                                        | MDR                                  | Call for caution with approved usage | II                   |
| 17-Apr-2018           | Certain Abbott (formerly St. Jude Medical) Implantable Cardiac Devices                | 2007                               | 3                         | PMA                           | Rapid Battery Depletion and cybersecurity error of unknown importance | MDR                                  | Call for caution with approved usage | I                    |
| 29-May-2018           | Surgical fires                                                                        | NA                                 | NA                        | NA                            | Injury and death                                                      | MDR                                  | Call for caution with approved usage | NA                   |
| 30-Jul-2018           | Energy-Based Devices to Perform Vaginal 'Rejuvenation' or Vaginal Cosmetic Procedures | NA                                 | NA                        | NA                            | Marketing of unauthorized device / unauthorized indication            | Regulator-initiated assessment       | Warning of unauthorized device       | NA                   |
| 14-Sep-2018           | Alcon CyPass Micro-Stent                                                              | 2016                               | 3                         | PMA                           | Damage to the cells lining the cornea                                 | Regulator-initiated assessment (PAS) | Withdrawal                           | I                    |
| 27-Sep-2018           | Pen needles                                                                           | NA                                 | NA                        | NA                            | Hyperglycemia, death                                                  | MDR                                  | Call for caution with approved usage | NA                   |
| 28-Sep-2018           | Mammography Problems at Aims Diagnostic Imaging in Manahawkin, NJ                     | NA                                 | 2                         | NA                            | Mammography machine failed quality test. Unknown impact               | Regulator-initiated assessment       | Warning of specific lots/providers   | NA                   |
| 22-Oct-2018           | Raindrop Near Vision Inlay                                                            | 2016                               | 3                         | PMA                           | Risk of developing of corneal haze                                    | Regulator-initiated assessment (PAS) | Withdrawal                           | I                    |
| 31-Oct-2018           | Genetic Tests with Unapproved Claims                                                  | NA                                 | NA                        | NA                            | Marketing / usage of unauthorized device / unauthorized indication    | Scientific publications              | Warning of unauthorized indication   | NA                   |
| 14-Nov-2018           | Implanted Pumps for Intrathecal Administration of Medicines for Pain Management       | 1982                               | 3                         | PMA                           | Marketing / usage of unauthorized device / unauthorized indication    | MDR                                  | Warning of unauthorized indication   | NA                   |
| 20-Dec-2018           | Teething Necklaces, Bracelets, and Other Jewelry                                      | NA                                 | NA                        | NA                            | Death and choking in children                                         | MDR                                  | Warning of unauthorized device       | NA                   |

| <b>MDSC publication date</b> | <b>Medical Device</b>                                                                           | <b>Initial approval year<sup>a</sup></b> | <b>Device Class<sup>a</sup></b> | <b>Approval pathway<sup>a</sup></b> | <b>Safety issue</b>                                                | <b>Signal source</b>           | <b>FDA action</b>                    | <b>Highest recall class</b> |
|------------------------------|-------------------------------------------------------------------------------------------------|------------------------------------------|---------------------------------|-------------------------------------|--------------------------------------------------------------------|--------------------------------|--------------------------------------|-----------------------------|
| 31-Jan-2019                  | Air-in-Line alert for Infusion Pumps, Fluid Warmers, and Rapid Infusers                         | NA                                       | NA                              | NA                                  | False "air-in-line" alarms causing delays in therapy               | MDR                            | Call for caution with approved usage | NA                          |
| 28-Feb-2019                  | Robotically-Assisted Surgical Devices in Women's Health                                         | NA                                       | 2                               | 510(k)                              | Marketing / usage of unauthorized device / unauthorized indication | Regulator-initiated assessment | Warning of unauthorized indication   | NA                          |
| 21-Mar-2019                  | Medtronic Implantable Cardiac Devices, Programmers, and Home Monitors                           | 2002                                     | 3                               | PMA                                 | Unknown cyber vulnerability - no impact yet                        | MDR                            | Call for caution with approved usage | II                          |
| 8-Apr-2019                   | Previously Owned Test Strips or Test Strips Not Authorized for Sale in the United States        | NA                                       | NA                              | NA                                  | Marketing / usage of unauthorized device / unauthorized indication | Scientific publications        | Warning of unauthorized device       | NA                          |
| 12-Apr-2019                  | Use Cleared or Approved Medical Devices to Help Assess or Diagnose a Head Injury and Concussion | NA                                       | NA                              | NA                                  | Marketing / usage of unauthorized device / unauthorized indication | Scientific publications        | Warning of unauthorized device       | NA                          |
| 25-Apr-2019                  | Wingspan Stent System                                                                           | 2005                                     | 2                               | HDE                                 | Higher incidence of stroke or death                                | Regulator-initiated assessment | Warning of unauthorized indication   | NA                          |
| 26-Apr-2019                  | Mammography Problems at East Palestine                                                          | NA                                       | 2                               | NA                                  | Mammography machine failed quality test. Unknown impact            | Regulator-initiated assessment | Warning of specific lots/providers   | NA                          |
| 7-May-2019                   | Medtronic Pacemakers                                                                            | 2017                                     | 3                               | PMA                                 | Early battery drainage                                             | MDR                            | Call for caution with approved usage | NA                          |
| 17-May-2019                  | Devices for Diabetes Management Not Authorized for Sale in the United States                    | NA                                       | NA                              | NA                                  | Insulin overdose requiring medical intervention                    | Scientific publications        | Warning of unauthorized device       | NA                          |
| 27-Jun-2019                  | Certain Medtronic MiniMed Insulin Pumps                                                         | 2000                                     | 2                               | 510(k)                              | Unknown cyber vulnerability - no impact yet                        | Homeland security              | Call for caution with approved usage | I                           |
| 1-Oct-2019                   | Devices with Interpeak IPnet TCP/IP stack (VxWorks)                                             | NA                                       | NA                              | NA                                  | Unknown cyber vulnerability - no impact yet                        | Homeland security              | Call for caution with approved usage | NA                          |
| 28-Oct-2019                  | Endologix AFX Endovascular AAA Graft Systems                                                    | 2011                                     | 3                               | PMA                                 | Endoleak - device failure                                          | Scientific publications        | Call for caution with approved usage | I                           |



|            |                                       |      |   |        |                                  |     |                                      |    |
|------------|---------------------------------------|------|---|--------|----------------------------------|-----|--------------------------------------|----|
| 5-Nov-2019 | Troponin lab test - biotin technology | 1996 | 2 | 510(k) | Possible error in troponin level | MDR | Call for caution with approved usage | NA |
|------------|---------------------------------------|------|---|--------|----------------------------------|-----|--------------------------------------|----|

EUA = Emergency Use Authorization; HDE = Humanitarian Device Exemption; MDR = Medical Device Reporting; MDSC = Medical Device Safety Communication; NA = Not Available; PAS = Post-Approval Studies; PMA = Premarket approval

<sup>a</sup> For some MDSCs, data regarding approval year, device class and / or approval pathway were not available. These include MDSCs for devices never authorized by the Food and Drug Administration, MDSCs whose subject was not a specific device and MDSCs referring to providers rather than specific devices.
